# Supplementary material for: Establishment of Human Neural Progenitor Cells from Human Induced Pluripotent Stem Cells with Diverse Tissue Origins
Source: Hindawi journal article supplement (doi:10.1155/2016/7235757), 2016-01-01
Supplement: f1 [file 7235757.f1.pdf]

## **SUPPLEMENTAL FIGURE LEGENDS**

### **Figure S1, Related to Figure 1.**

(A) Morphologies of hiPSCs and EBFM-derived day 9 and day 30 EBs. Scale bar, 500  $\mu\text{m}$ ; P, passage number.

(B, C) Gene expression panels of hiPSCs (B) and EBFM-derived day 30 EBs (C). The delta Ct values for

*Oct4*, *NANOG*, *LIN28A*, *SOX17*, *T*, *SOX1*, and *PAX6* are shown. Red: high expression. (D) Hierarchical

clustering of clones in day 30 EBs based on the expression of *SOX1*, *PAX6*, *SOX17*, and *T*.

### **Figure S2, Related to Figure 1 and Figure 2.**

Gene expression panels of the dSMADi-derived day 14 neural aggregates cultured under various conditions.

The delta Ct values for *Oct4*, *NANOG*, *LIN28A*, *SOX17*, *T*, *SOX1*, and *PAX6* are shown. Red: high gene

expression.

### **Figure S3, Related to Figure 2.**

Morphologies of the day 7 and day 14 neural aggregates generated from the HDF-, CB-, and PBMN-derived

clones using dSMADi under various experimental conditions.

### **Table S1, Related to methods.**

### **Table S2, Related to Figure 2.**

### **Table S3, Related to Figure 3.**

### **Table S4, Related to methods.**

**Figure S1**

**A**

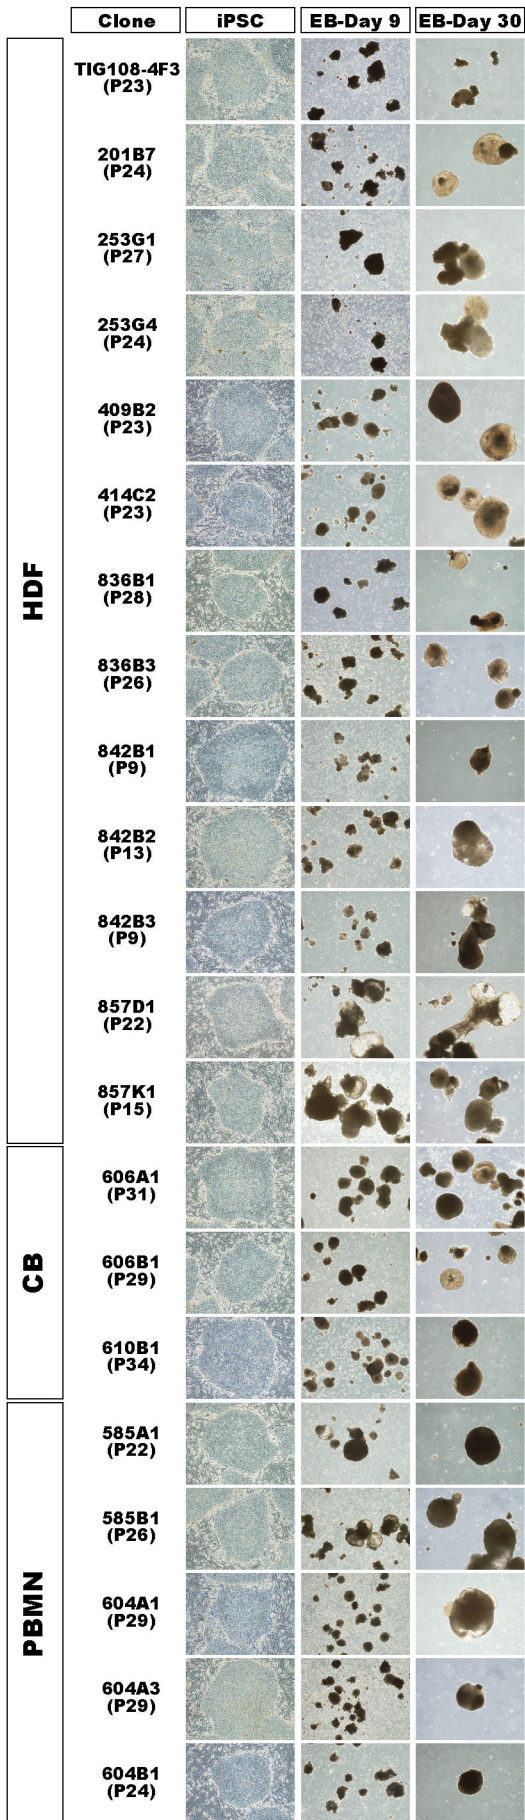

— 500  $\mu$ m

**B**

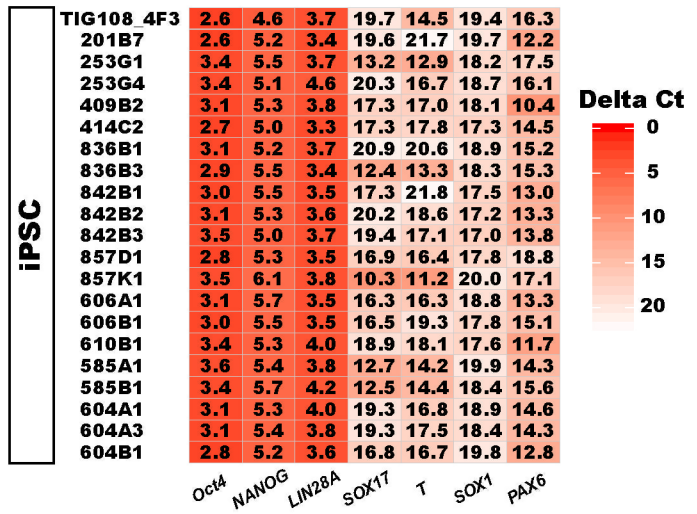

**C**

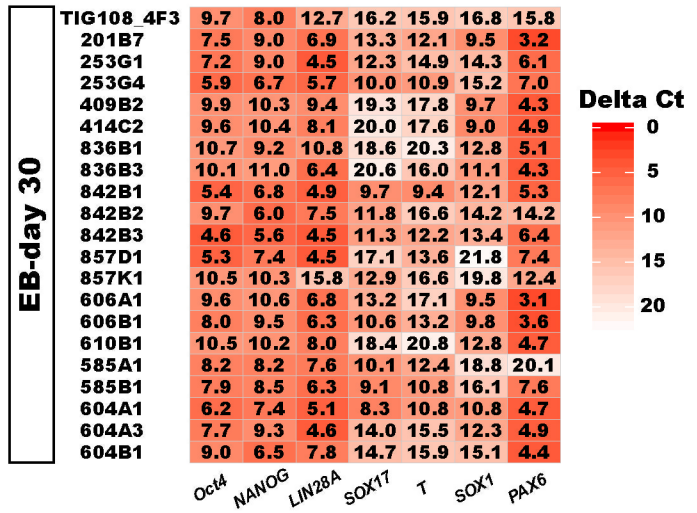

**D**

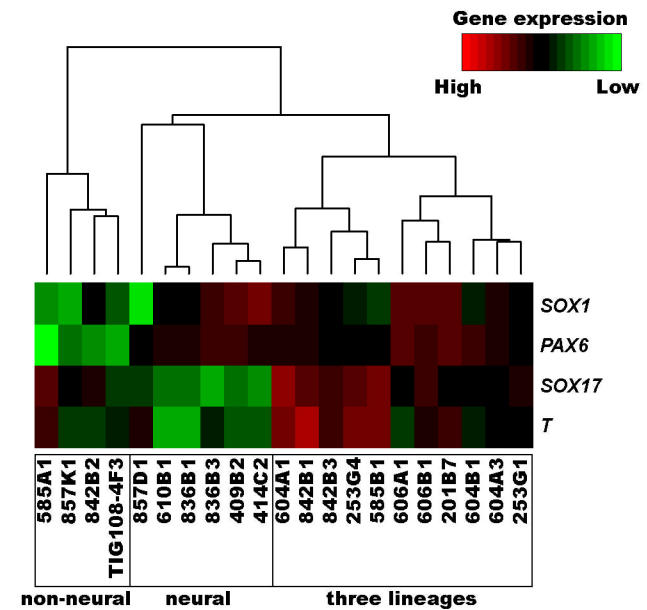

**Figure S2**

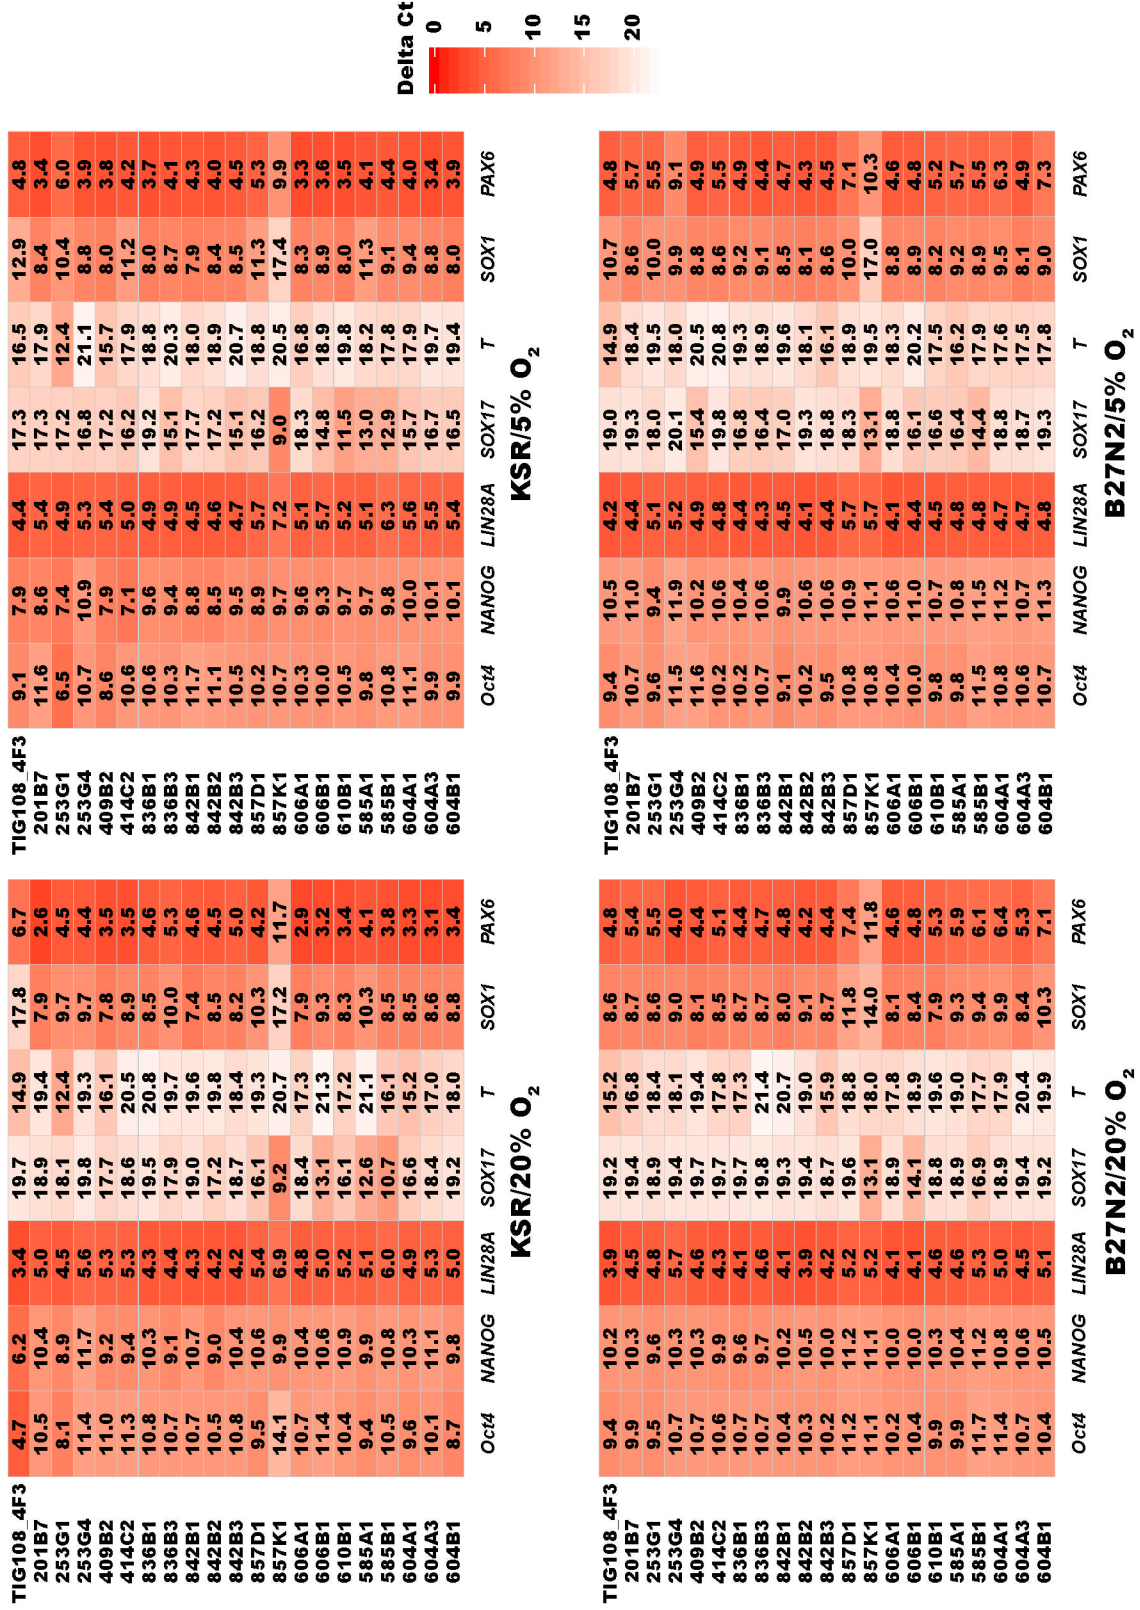



**Figure S3**

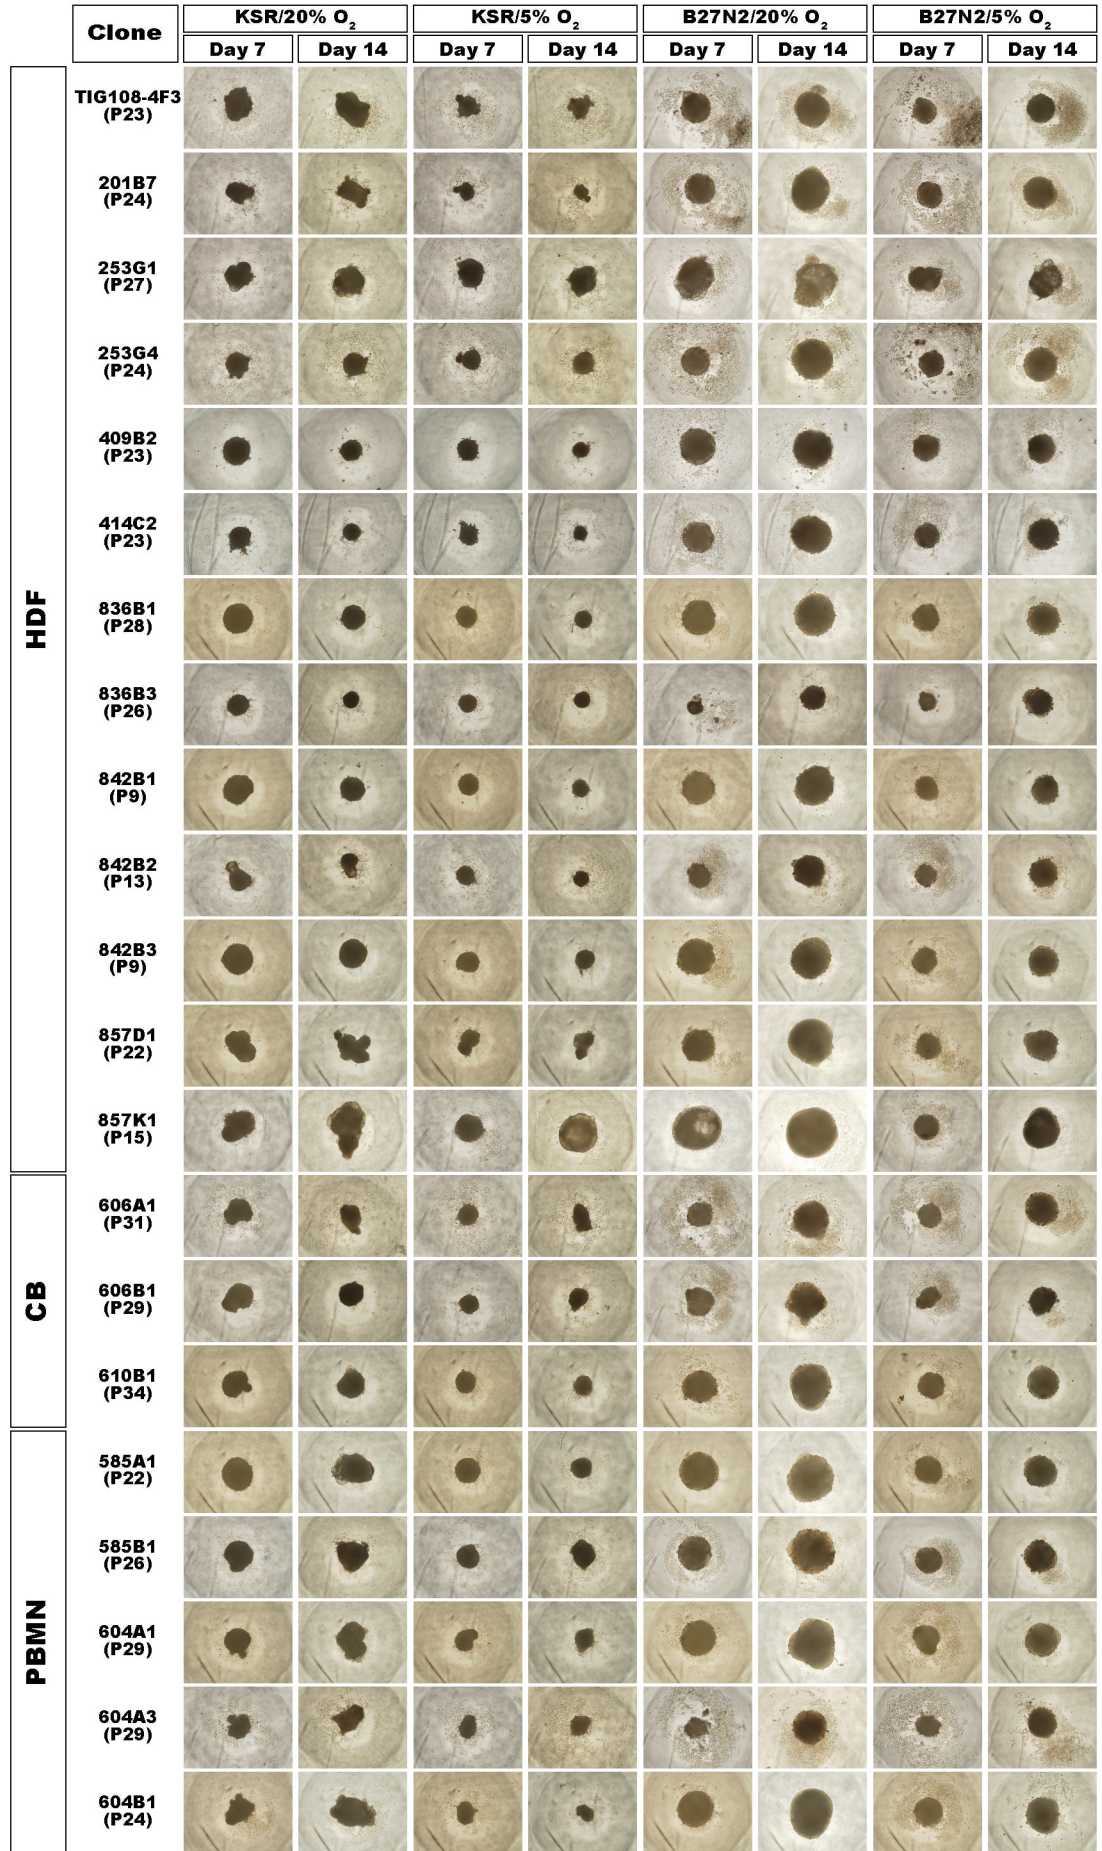

— 500 μm



Table S1, Related to Methods. Information of hiPSCs used in this study.

| Clone      | Passage no. | Vector     | Factors                                         | Feeder | Origin <sup>a</sup>            | Age | Sex | Race <sup>b</sup> |
|------------|-------------|------------|-------------------------------------------------|--------|--------------------------------|-----|-----|-------------------|
| TIG108-4F3 | 23          | retrovirus | <i>Oct4, SOX2, KLF4, (M)</i>                    | SNL    | HDF (TIG108)                   | 40  | F   | J                 |
| 201B7      | 24          | retrovirus | <i>Oct4, SOX2, KLF4, c-Myc</i>                  | SNL    | HDF (HDF1388)                  | 36  | F   | C                 |
| 253G1      | 27          | retrovirus | <i>Oct4, SOX2, KLF4</i>                         | SNL    | HDF (HDF1388)                  | 36  | F   | C                 |
| 253G4      | 24          | retrovirus | <i>Oct4, SOX2, KLF4</i>                         | SNL    | HDF (HDF1388)                  | 36  | F   | C                 |
| 409B2      | 23          | plasmid    | <i>Oct4, SOX2, KLF4, MYCL, LIN28, p53-shRNA</i> | SNL    | HDF (HDF1388)                  | 36  | F   | C                 |
| 414C2      | 23          | plasmid    | <i>Oct4, SOX2, KLF4, MYCL, LIN28, p53-shRNA</i> | SNL    | HDF (HDF1388)                  | 36  | F   | C                 |
| 836B1      | 28          | plasmid    | <i>Oct4, SOX2, KLF4, MYCL, LIN28, GLIS1</i>     | SNL    | HDF (HDF1388)                  | 36  | F   | C                 |
| 836B3      | 26          | plasmid    | <i>Oct4, SOX2, KLF4, MYCL, LIN28, GLIS1</i>     | SNL    | HDF (HDF1388)                  | 36  | F   | C                 |
| 842B1      | 9           | plasmid    | <i>Oct4, SOX2, KLF4, MYCL, LIN28, GLIS1</i>     | SNL    | HDF (TIG114)                   | 36  | M   | J                 |
| 842B2      | 13          | plasmid    | <i>Oct4, SOX2, KLF4, MYCL, LIN28, GLIS1</i>     | SNL    | HDF (TIG114)                   | 36  | M   | J                 |
| 842B3      | 9           | plasmid    | <i>Oct4, SOX2, KLF4, MYCL, LIN28, GLIS1</i>     | SNL    | HDF (TIG114)                   | 36  | M   | J                 |
| 857D1      | 22          | plasmid    | <i>Oct4, SOX2, KLF4, MYCL, LIN28, GLIS1</i>     | SNL    | HDF (TIG120)                   | 6   | F   | J                 |
| 857K1      | 15          | plasmid    | <i>Oct4, SOX2, KLF4, MYCL, LIN28, GLIS1</i>     | SNL    | HDF (TIG120)                   | 6   | F   | J                 |
| 606A1      | 31          | plasmid    | <i>Oct4, SOX2, KLF4, MYCL, LIN28, p53-shRNA</i> | SNL    | CB CD34+ (donor a)             | 0   | F   | UN                |
| 606B1      | 29          | plasmid    | <i>Oct4, SOX2, KLF4, MYCL, LIN28, p53-shRNA</i> | SNL    | CB CD34+ (donor a)             | 0   | F   | UN                |
| 610B1      | 34          | plasmid    | <i>Oct4, SOX2, KLF4, MYCL, LIN28, p53-shRNA</i> | SNL    | CB CD34+ (donor b)             | 0   | M   | UN                |
| 585A1      | 22          | plasmid    | <i>Oct4, SOX2, KLF4, MYCL, LIN28, p53-shRNA</i> | SNL    | PBMN $\alpha\beta$ T (donor x) | 30s | M   | J                 |
| 585B1      | 26          | plasmid    | <i>Oct4, SOX2, KLF4, MYCL, LIN28, p53-shRNA</i> | SNL    | PBMN $\alpha\beta$ T (donor x) | 30s | M   | J                 |
| 604A1      | 29          | plasmid    | <i>Oct4, SOX2, KLF4, MYCL, LIN28, p53-shRNA</i> | SNL    | PBMN $\alpha\beta$ T (donor y) | 30s | M   | J                 |
| 604A3      | 29          | plasmid    | <i>Oct4, SOX2, KLF4, MYCL, LIN28, p53-shRNA</i> | SNL    | PBMN $\alpha\beta$ T (donor y) | 30s | M   | J                 |
| 604B1      | 24          | plasmid    | <i>Oct4, SOX2, KLF4, MYCL, LIN28, p53-shRNA</i> | SNL    | PBMN $\alpha\beta$ T (donor y) | 30s | M   | J                 |

a: HDF, Human Dermal Fibroblast; CB, Cord Blood; PBMN, Peripheral Blood MonoNuclear cell.

b: J, Japanese; C, Caucasian; UN, Unknown.

Table S2, Related to Figure 2. Comparison of two types of media and oxygen levels on the size of day 7 and day 14 neural aggregates. Data were analyzed with the Steel-Dwass test. The resulting p-values are shown for the statistically significant differences (\*;  $p < 0.05$ , \*\*;  $p < 0.01$ ). Differences that were not statistically significant are indicated by dashes (-).

|       |                    |        | KSR                |            |                   |            | B27N2              |            |                   |        |
|-------|--------------------|--------|--------------------|------------|-------------------|------------|--------------------|------------|-------------------|--------|
|       |                    |        | 20% O <sub>2</sub> |            | 5% O <sub>2</sub> |            | 20% O <sub>2</sub> |            | 5% O <sub>2</sub> |        |
|       |                    |        | Day 7              | Day 14     | Day 7             | Day 14     | Day 7              | Day 14     | Day 7             | Day 14 |
| KSR   | 20% O <sub>2</sub> | Day 7  | -                  | 1.35E-04** | 4.26E-04**        | -          | 6.49E-06**         | -          | 2.49E-02*         |        |
|       |                    | Day 14 | -                  | 4.99E-02*  | 3.16E-02*         | -          | 3.10E-05**         | -          | -                 |        |
|       | 5% O <sub>2</sub>  | Day 7  | -                  | -          | -                 | 1.86E-05** | 8.10E-07**         | 9.15E-04** | 8.10E-07**        |        |
|       |                    | Day 14 | -                  | -          | -                 | 1.51E-04** | 5.68E-06**         | 3.47E-03** | 1.43E-05**        |        |
| B27N2 | 20% O <sub>2</sub> | Day 7  | -                  | -          | -                 | -          | 2.15E-04**         | 8.89E-03** | -                 |        |
|       |                    | Day 14 | -                  | -          | -                 | -          | -                  | 8.10E-07** | 8.48E-06**        |        |
|       | 5% O <sub>2</sub>  | Day 7  | -                  | -          | -                 | -          | -                  | -          | 2.73E-05**        |        |
|       |                    | Day 14 | -                  | -          | -                 | -          | -                  | -          | -                 |        |



Table S3, Related to Figure 3. The neural aggregates were clustered based on *FOXG1* and *SOX1* expression levels using the K-medoids clustering method. Clones selected for further expansion are checked in the column on the right.

| Cell       | Condition  | Origin | <i>FOXG1</i> : <i>SOX1</i> | Selected clones for further expansion |
|------------|------------|--------|----------------------------|---------------------------------------|
| TIG108_4F3 | BN/20% O2  | HDF    | High : High                | -                                     |
| TIG108_4F3 | BN/5% O2   | HDF    | High : High                | -                                     |
| 201B7      | BN/20% O2  | HDF    | High : High                | -                                     |
| 253G1      | BN/20% O2  | HDF    | High : High                | ✓                                     |
| 409B2      | KSR/20% O2 | HDF    | High : High                | -                                     |
| 409B2      | KSR/5% O2  | HDF    | High : High                | ✓                                     |
| 409B2      | BN/20% O2  | HDF    | High : High                | -                                     |
| 409B2      | BN/5% O2   | HDF    | High : High                | -                                     |
| 414C2      | BN/20% O2  | HDF    | High : High                | -                                     |
| 836B1      | KSR/20% O2 | HDF    | High : High                | -                                     |
| 836B1      | KSR/5% O2  | HDF    | High : High                | -                                     |
| 836B1      | BN/20% O2  | HDF    | High : High                | -                                     |
| 836B3      | KSR/20% O2 | HDF    | High : High                | -                                     |
| 836B3      | BN/20% O2  | HDF    | High : High                | -                                     |
| 836B3      | BN/5% O2   | HDF    | High : High                | -                                     |
| 842B1      | KSR/20% O2 | HDF    | High : High                | -                                     |
| 842B1      | KSR/5% O2  | HDF    | High : High                | -                                     |
| 842B1      | BN/20% O2  | HDF    | High : High                | -                                     |
| 842B1      | BN/5% O2   | HDF    | High : High                | -                                     |
| 842B2      | KSR/20% O2 | HDF    | High : High                | -                                     |
| 842B2      | KSR/5% O2  | HDF    | High : High                | -                                     |
| 842B2      | BN/20% O2  | HDF    | High : High                | -                                     |
| 842B2      | BN/5% O2   | HDF    | High : High                | -                                     |
| 842B3      | KSR/20% O2 | HDF    | High : High                | -                                     |
| 842B3      | KSR/5% O2  | HDF    | High : High                | -                                     |
| 842B3      | BN/20% O2  | HDF    | High : High                | -                                     |
| 606A1      | KSR/20% O2 | CB     | High : High                | ✓                                     |
| 606A1      | BN/20% O2  | CB     | High : High                | -                                     |
| 606B1      | BN/20% O2  | CB     | High : High                | -                                     |
| 610B1      | KSR/20% O2 | CB     | High : High                | -                                     |
| 610B1      | KSR/5% O2  | CB     | High : High                | -                                     |
| 610B1      | BN/20% O2  | CB     | High : High                | -                                     |
| 610B1      | BN/5% O2   | CB     | High : High                | -                                     |
| 604A3      | BN/20% O2  | PBMN   | High : High                | ✓                                     |
| TIG108_4F3 | KSR/5% O2  | HDF    | Middle : High              | -                                     |
| 201B7      | KSR/5% O2  | HDF    | Middle : High              | ✓                                     |
| 201B7      | BN/5% O2   | HDF    | Middle : High              | -                                     |
| 253G1      | KSR/5% O2  | HDF    | Middle : High              | -                                     |
| 253G1      | BN/5% O2   | HDF    | Middle : High              | ✓                                     |
| 414C2      | KSR/20% O2 | HDF    | Middle : High              | -                                     |
| 414C2      | KSR/5% O2  | HDF    | Middle : High              | -                                     |
| 836B3      | KSR/5% O2  | HDF    | Middle : High              | -                                     |
| 842B3      | BN/5% O2   | HDF    | Middle : High              | -                                     |
| 857D1      | KSR/5% O2  | HDF    | Middle : High              | -                                     |
| 606A1      | KSR/5% O2  | CB     | Middle : High              | -                                     |
| 606A1      | BN/5% O2   | CB     | Middle : High              | ✓                                     |
| 606B1      | KSR/20% O2 | CB     | Middle : High              | ✓                                     |
| 606B1      | BN/5% O2   | CB     | Middle : High              | -                                     |
| 585A1      | KSR/5% O2  | PBMN   | Middle : High              | ✓                                     |
| 585B1      | BN/5% O2   | PBMN   | Middle : High              | -                                     |
| 604A3      | BN/5% O2   | PBMN   | Middle : High              | ✓                                     |
| 604B1      | KSR/5% O2  | PBMN   | Middle : High              | -                                     |
| 201B7      | KSR/20% O2 | HDF    | Low : High                 | -                                     |
| 253G1      | KSR/20% O2 | HDF    | Low : High                 | ✓                                     |
| 253G4      | KSR/20% O2 | HDF    | Low : High                 | -                                     |
| 253G4      | KSR/5% O2  | HDF    | Low : High                 | -                                     |
| 253G4      | BN/20% O2  | HDF    | Low : High                 | -                                     |
| 253G4      | BN/5% O2   | HDF    | Low : High                 | ✓                                     |

|            |            |      |            |   |
|------------|------------|------|------------|---|
| 414C2      | BN/5% O2   | HDF  | Low : High | - |
| 836B1      | BN/5% O2   | HDF  | Low : High | - |
| 857D1      | KSR/20% O2 | HDF  | Low : High | - |
| 857D1      | BN/20% O2  | HDF  | Low : High | - |
| 857D1      | BN/5% O2   | HDF  | Low : High | - |
| 606B1      | KSR/5% O2  | CB   | Low : High | ✓ |
| 585A1      | KSR/20% O2 | PBMN | Low : High | - |
| 585A1      | BN/20% O2  | PBMN | Low : High | - |
| 585A1      | BN/5% O2   | PBMN | Low : High | - |
| 585B1      | KSR/20% O2 | PBMN | Low : High | - |
| 585B1      | KSR/5% O2  | PBMN | Low : High | - |
| 585B1      | BN/20% O2  | PBMN | Low : High | - |
| 604A1      | KSR/20% O2 | PBMN | Low : High | - |
| 604A1      | KSR/5% O2  | PBMN | Low : High | - |
| 604A1      | BN/20% O2  | PBMN | Low : High | - |
| 604A1      | BN/5% O2   | PBMN | Low : High | ✓ |
| 604A3      | KSR/20% O2 | PBMN | Low : High | - |
| 604A3      | KSR/5% O2  | PBMN | Low : High | ✓ |
| 604B1      | KSR/20% O2 | PBMN | Low : High | - |
| 604B1      | BN/20% O2  | PBMN | Low : High | - |
| 604B1      | BN/5% O2   | PBMN | Low : High | - |
| TIG108_4F3 | KSR/20% O2 | HDF  | Low : Low  | - |
| 857K1      | KSR/20% O2 | HDF  | Low : Low  | - |
| 857K1      | KSR/5% O2  | HDF  | Low : Low  | - |
| 857K1      | BN/20% O2  | HDF  | Low : Low  | - |
| 857K1      | BN/5% O2   | HDF  | Low : Low  | - |



Table S4, Related to Experimental Procedures. Primers for quantitative RT-PCR.

| <b>Gene Symbol</b> | <b>Forward Primer (5' to 3')</b> | <b>Reverse Primer (5' to 3')</b> |
|--------------------|----------------------------------|----------------------------------|
| <i>Oct4</i>        | GACAGGGGGAGGGGAGGAGCTAGG         | CTTCCCTCCAACCAGTTGCCCAAAC        |
| <i>NANOG</i>       | GCAGAAGGCCTCAGCACCTA             | GGTCCCAGTCGGGTTCAC               |
| <i>LIN28A</i>      | CACGGTGCGGGCATCTG                | CCTTCCATGTGCAGCTTACTC            |
| <i>SOX17</i>       | CCCATAGTTGGATTGTCAAAACC          | CACACCCAGGACAACATTTCTTT          |
| <i>T</i>           | TGGAATGCCTGCCCATC                | CCGTTGCTCACAGACCACA              |
| <i>SOX1</i>        | AGCAGTTGTTTCTGGAAGAGTCTGT        | AGGCCCTTATCCCGGACTAA             |
| <i>SOX2</i>        | ATGCACCGCTACGACGTGA              | CTTTTGCACCCCTCCCATTT             |
| <i>PAX6</i>        | ACCTGGCTAGCGAAAAGCAA             | CCCGTTCAACATCCTTAGTTTATCA        |
| <i>NES</i>         | CCAAGACTGCCCTGGAAAC              | CCTCCCTCTCCAAGGAAACA             |
| <i>PROM1</i>       | GCACTTACGGCACTCTTCACC            | CTATTCCACAAGCAGCAAAAATCC         |
| <i>CDH2</i>        | GGACAGTTCCTGAGGGATCA             | GGATTGCCTTCCATGTCTGT             |
| <i>BLBP</i>        | GGACTCTCAGCACATTCAAGAA           | CCACATCACAAAAGTAAGGGT            |
| <i>GFAP</i>        | ACATCGAGATCGCCACCTAC             | ACATCACATCCTTGTGCTCC             |
| <i>S100B</i>       | CTCATCGACGTTTTCCACCA             | CACAACCTCCTGCTCTTTGATTT          |
| <i>TUBA1A</i>      | AGCTCGGCAGTCGCGAAGCAG            | CAATGACTGTGGGTCCAAGTCTAC         |
| <i>TUBB3</i>       | GGGCCTTTGGACATCTCTTC             | ACTCCTTCCGCACCACATC              |
| <i>DLX2</i>        | ACGCTCCCTATGGAACCAGTT            | TCCGAATTTCAAGGCTCAAGGT           |
| <i>FOXG1</i>       | CAAGGAGGGCGAGAAGAAGA             | GATGAACTCGTAGATGCCGTTG           |
| <i>OTX1</i>        | GTGGCGCTCAAGATCAACC              | TCCCGCACTGGAGAGGACTT             |
| <i>EN1</i>         | TGGGTGTAAGTGCACACGTTATTC         | TGTCCTCCTTCTCGTTCTTCTTCT         |
| <i>GBX2</i>        | CCAAGTGGAAACGGGTGAA              | ATGCTGACTTCTGATAGCGAACC          |
| <i>HOXC6</i>       | CCCAGGACCAGAAAGCCAGT             | GGTCTGGTACCGCGAGTAGAT            |
| <i>GAPDH</i>       | CCACTTTGTCAAGCTCATTTCCT          | TCTCTTCCTCTTGTGCTCTTGCT          |
